# Supplementary material for: Buserelin treatment to rats causes enteric neurodegeneration with moderate effects on CRF-immunoreactive neurons and Enterobacteriaceae in colon, and in acetylcholine-mediated permeability in ileum
Source: PubMed Central journal article supplement (PMC4693429; doi:10.1186/s13104-015-1800-x), 2015-12-28

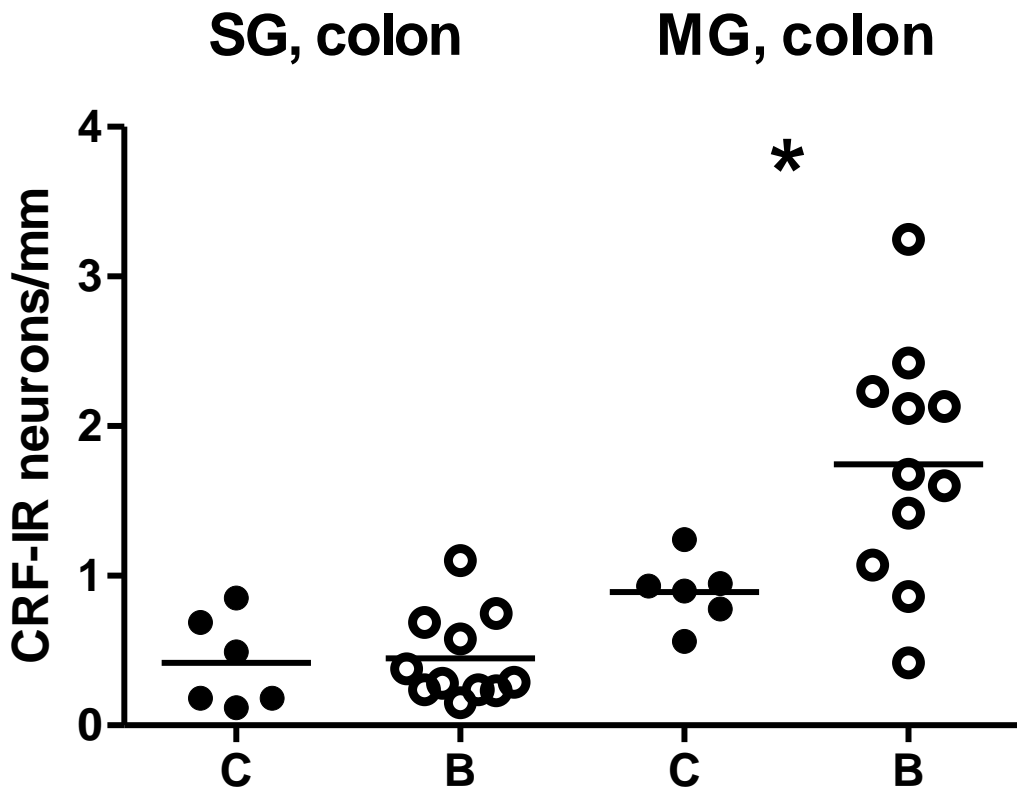

Supplement: 13104_2015_1800_MOESM1_ESM.pdf [file 13104_2015_1800_MOESM1_ESM.pdf]
